# Supplementary material
Source: MDPI journal article supplement (https://www.mdpi.com/2624-8611/2/4/25)
Supplement: s1 [file s1]

# Translation and Validation of the Mindful Self-Care Scale—Chinese Version: A Pilot Study

Ming Yu Claudia Wong

Supplementary Materials

Table S1. Mindful Self-care Scale

|                                                                                                         | Never<br>(0 days)<br>= 1 | Rarely<br>(1 day) =<br>2 | Sometimes (2<br>to 3 days) = 3 | Often (4<br>to 5<br>days) =4 | Regularly (6<br>to 7 days) = 5 |
|---------------------------------------------------------------------------------------------------------|--------------------------|--------------------------|--------------------------------|------------------------------|--------------------------------|
| <b>Mindful Relaxation</b>                                                                               |                          |                          |                                |                              |                                |
| I did something intellectual (using my mind) to help me relax (e.g., read a book, wrote) .              |                          |                          |                                |                              |                                |
| I did something interpersonal to relax (e.g., connected with friends) .                                 |                          |                          |                                |                              |                                |
| I did something creative to relax (e.g., drew, played instrument, wrote creatively, sang, organized).   |                          |                          |                                |                              |                                |
| I listened to relax (e.g., to music, a podcast, radio show, rainforest sounds)                          |                          |                          |                                |                              |                                |
| I sought out images to relax (e.g., art, film, window shopping, nature).                                |                          |                          |                                |                              |                                |
| I sought out smells to relax (lotions, nature, candles/incense, smells of baking) .                     |                          |                          |                                |                              |                                |
| <b>Physical Care</b>                                                                                    |                          |                          |                                |                              |                                |
| I drank at least 6 to 8 cups of water .                                                                 |                          |                          |                                |                              |                                |
| I ate a variety of nutritious foods (e.g., vegetables, protein, fruits, and grains)                     |                          |                          |                                |                              |                                |
| I planned my meals and snacks .                                                                         |                          |                          |                                |                              |                                |
| I exercised at least 30 to 60 minutes .                                                                 |                          |                          |                                |                              |                                |
| I took part in sports, dance or other scheduled physical activities (e.g., sports teams, dance classes) |                          |                          |                                |                              |                                |
| I did sedentary activities instead of exercising (e.g., watched tv, worked on the computer) .           |                          |                          |                                |                              |                                |
| I planned/scheduled my exercise for the day.                                                            |                          |                          |                                |                              |                                |
| I practiced yoga or another mind/body practice (e.g., Tae                                               |                          |                          |                                |                              |                                |

|                                                                                                       |
|-------------------------------------------------------------------------------------------------------|
| Kwon Do, Tai Chi)                                                                                     |
| <b>Self-Compassion and Purpose</b>                                                                    |
| I kindly acknowledged my own challenges and difficulties.                                             |
| I engaged in supportive and comforting self-talk (e.g., "My effort is valuable and meaningful").      |
| I reminded myself that failure and challenge are part of the human experience.                        |
| I gave myself permission to feel my feelings (e.g., allowed myself to cry).                           |
| I experienced meaning and/or a larger purpose in my <i>work/school</i> life (e.g., for a cause).      |
| I experienced meaning and/or a larger purpose in my <i>private/personal</i> life (e.g., for a cause). |
| <b>Supportive Relationships</b>                                                                       |
| I spent time with people who are good to me (e.g., support, encourage, and believe in me).            |
| I scheduled/planned time to be with people who are special to me.                                     |
| I felt supported by people in my life.                                                                |
| I felt confident that people in my life would respect my choice if I said "no".                       |
| I felt that I had someone who would listen to me if I became upset (e.g., friend, counsellor, group)  |
| <b>Supportive Structure</b>                                                                           |
| I maintained a manageable schedule                                                                    |
| I kept my work/schoolwork area organized to support my work/school tasks                              |
| I maintained balance between the demands of others and what is important to me                        |
| I maintained a comforting and pleasing living environment                                             |
| <b>Mindful Awareness</b>                                                                              |
| I had a calm awareness of my thoughts.                                                                |

---

I had a calm awareness of my  
feelings.

---

I had a calm awareness of my  
body .

---

I carefully selected which of my  
thoughts and feelings I used to  
guide my actions .

---

**General**

---

I engaged in a variety of self-care  
activities.

---

I planned my self-care.

---

I explored new ways to bring self-  
care into my life.

---

Tick the number that reflects the frequency of your behaviour (how much or how often) within past  
week (7 days).
